# Supplementary material for: A BINOL-based ratiometric fluorescent sensor for Zn2+ and in situ generated ensemble for selective recognition of histidine in aqueous solution
Source: Royal Society of Chemistry journal article supplement (doi:10.1039/c3an00979c), 2013-01-01

## Supporting information

# A BINOL-based Ratiometric Fluorescent Sensor for Zn<sup>2+</sup> and In Situ Generated Ensemble for Selective Recognition of Histidine in Aqueous Solution

Shu-Yan Jiao,<sup>a</sup> Ling-Ling Peng,<sup>b</sup> Kun Li,<sup>\*a</sup> Yong-Mei Xie,<sup>b</sup> Mei-Zhen Ao,<sup>a</sup> Xin Wang<sup>\*a</sup>  
and Xiao-Qi Yu<sup>\*a</sup>

<sup>a</sup> Key Laboratory of Green Chemistry and Technology, Ministry of Education, College of Chemistry, Sichuan University, Chengdu, 610064, China Fax: (86)-28-85415886; Tel: (86)-28-85415886;  
E-mail: kli@scu.edu.cn; xqyu@scu.edu.cn.

<sup>b</sup> State Key Laboratory of Biotherapy, West China Hospital, West China Medical School, Sichuan University, Chengdu 610041, China

## Contents

### 1. Supplementary schemes and figures

|                                                                                                                                                            |   |
|------------------------------------------------------------------------------------------------------------------------------------------------------------|---|
| Scheme S1 Synthesis route for <b>R4</b>                                                                                                                    | 2 |
| Fig. S1 Fluorescence responses of <b>R4</b> with different test metals                                                                                     | 2 |
| Fig. S2 Job's plot of <b>R2</b> and Pb <sup>2+</sup>                                                                                                       | 2 |
| Fig. S3. The determination <b>R2</b> of the detection limit (LOD) for Zn <sup>2+</sup>                                                                     | 3 |
| Fig. S4 The visual emission of <b>R2</b> with Zn <sup>2+</sup> under a UV lamp                                                                             | 3 |
| Fig. S5 The pH responses of <b>R2</b> with Zn <sup>2+</sup>                                                                                                | 4 |
| Fig. S6 <sup>1</sup> H NMR spectra changes of Hb and Hc (400 MHz) of <b>R2</b> in d <sub>6</sub> -DMSO with titration of various equiv of Zn <sup>2+</sup> | 4 |
| Fig. S7 Plot of relative fluorescence intensity of <b>R2</b> -Zn <sup>2+</sup> complex versus the mole ratio of added Histidine                            | 5 |
| Fig. S8 Absorption spectra of <b>R2</b> during the titration of <b>R2</b> -Zn <sup>2+</sup> complex with Histidine                                         | 5 |
| Fig. S9 Fluorescence spectra of <b>R2</b> (10 μM) in CH <sub>3</sub> CN/HEPES = 1:1 (V/V). Upon addition of (30 μM) various metal ions.                    | 6 |

### 2. <sup>1</sup>H-NMR, <sup>13</sup>C-NMR and HRMS spectra of R1/R2/R3/R4 and intermediates. 6

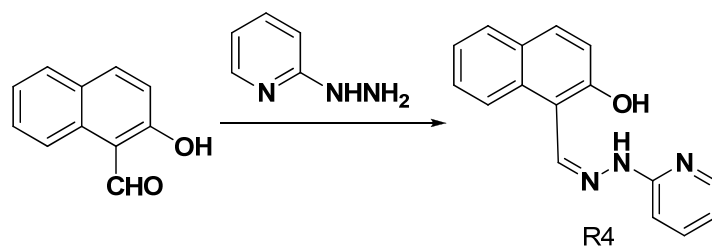

Scheme S1 Synthesis route for R4

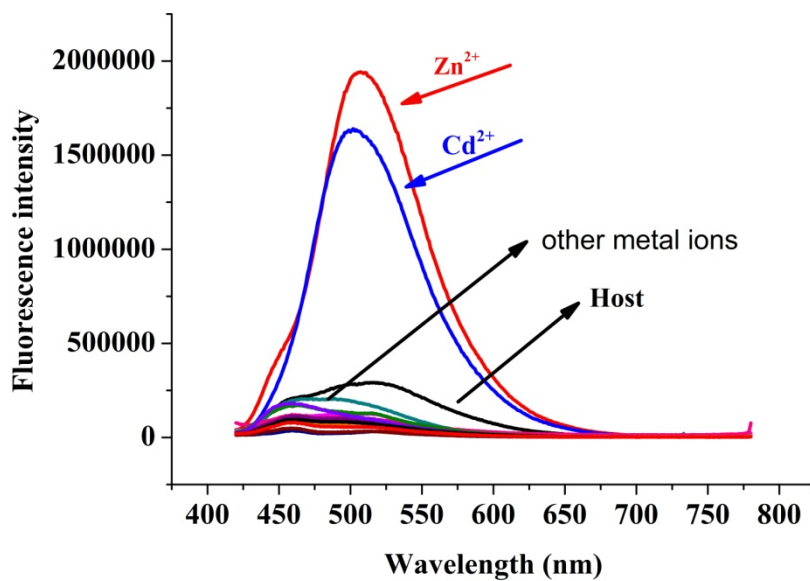

Fig.S1 Fluorescence responses of R4 with different test metals.

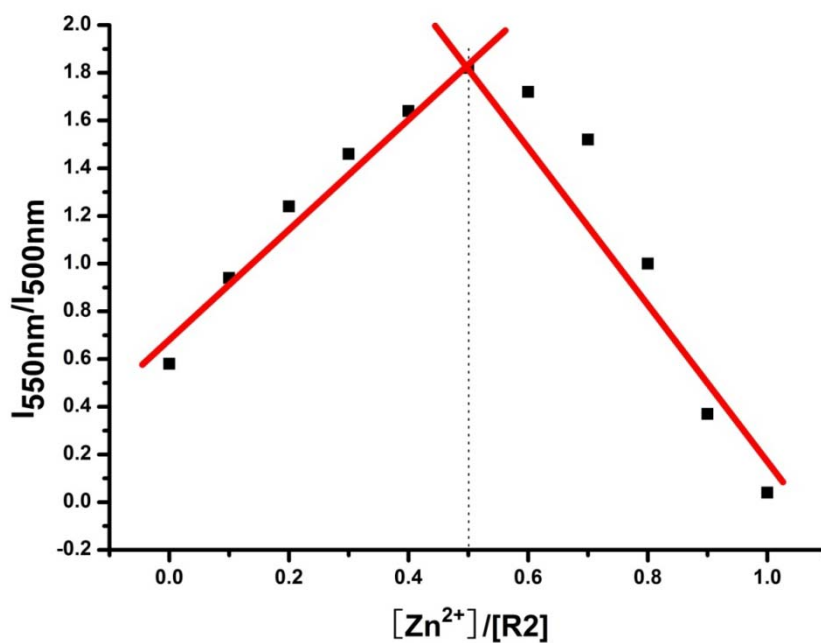

Fig.S2 The Job plot using ratio of emissions ( $I_{550\text{nm}}/I_{500\text{nm}}$ ) of R2 and Zn<sup>2+</sup> in CH<sub>3</sub>CN/HEPES=1:1(v/v), total

concentration of **R2** and  $[Zn^{2+}]$  was 10  $\mu$ M.

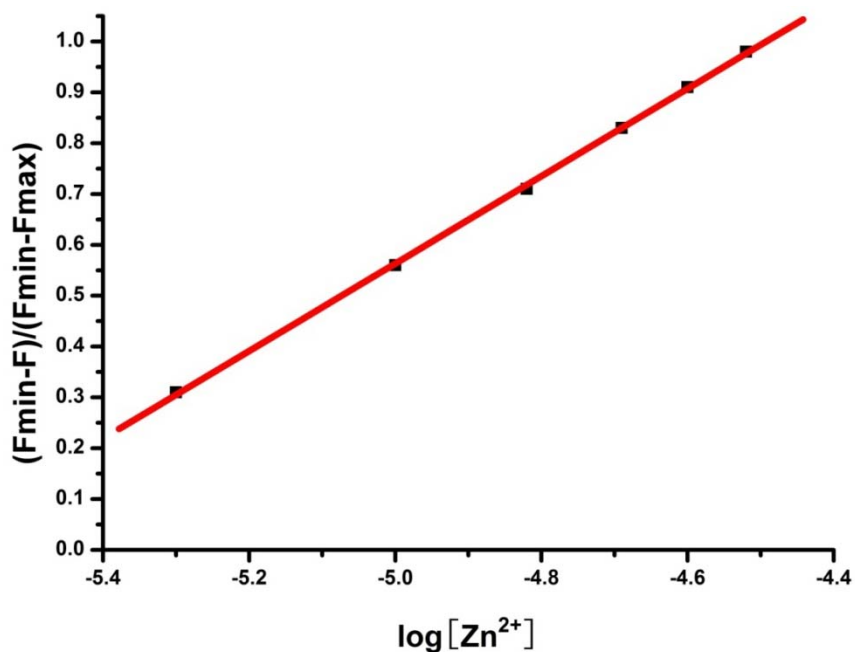

**Fig.S3** The determination **R2** of the detection limit (LOD) for  $Zn^{2+}$  in HEPES buffer (10 mM, pH =7.4  $CH_3CN$ :HEPES = 1:1,v/v)  $F = I_{550\text{ nm}}/I_{500\text{ nm}}$

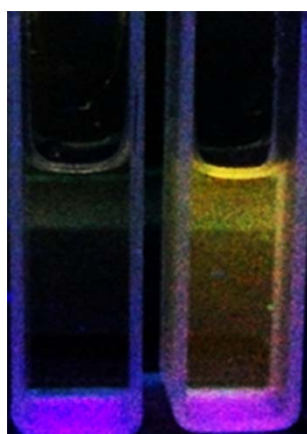

**Figure S4.** The color change of **R2** (20  $\mu$ M) in HEPES (10 mM, pH = 7.4) under a UV lamp (365 nm) by addition of 2 equiv.  $Zn^{2+}$ . From left to right: **R2**, **R2**+2 equiv  $Zn^{2+}$

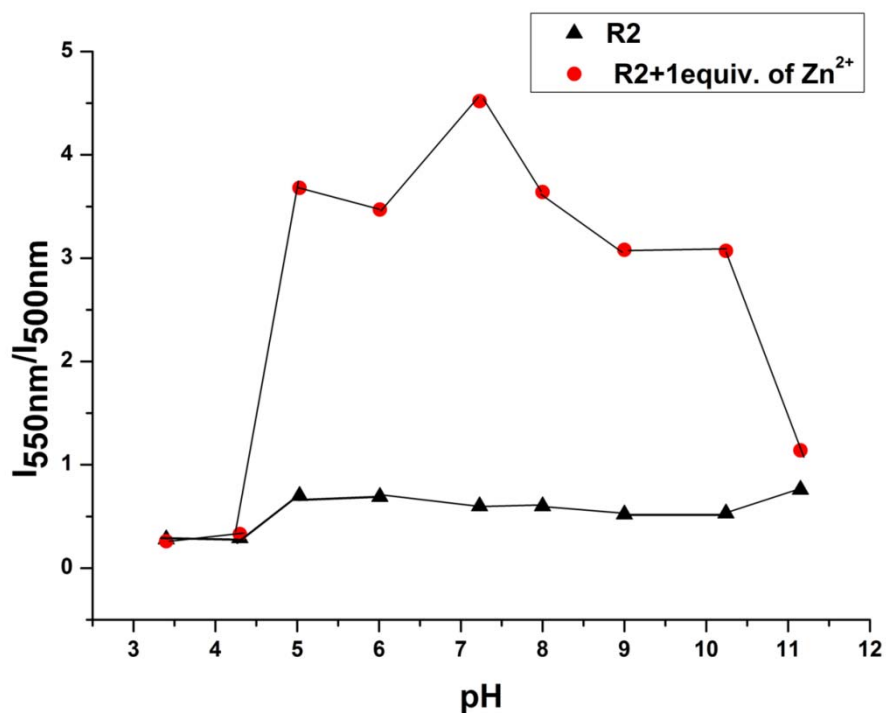

Fig.S5 Ratio of emissions ( $I_{550\text{nm}}/I_{500\text{nm}}$ ) of **R2** in  $\text{CH}_3\text{CN}/\text{HEPES}$  ( $v/v=1:1$  PH=7.4) with (red) and without (black) of  $\text{Zn}^{2+}$  (1 equiv) as a function of pH

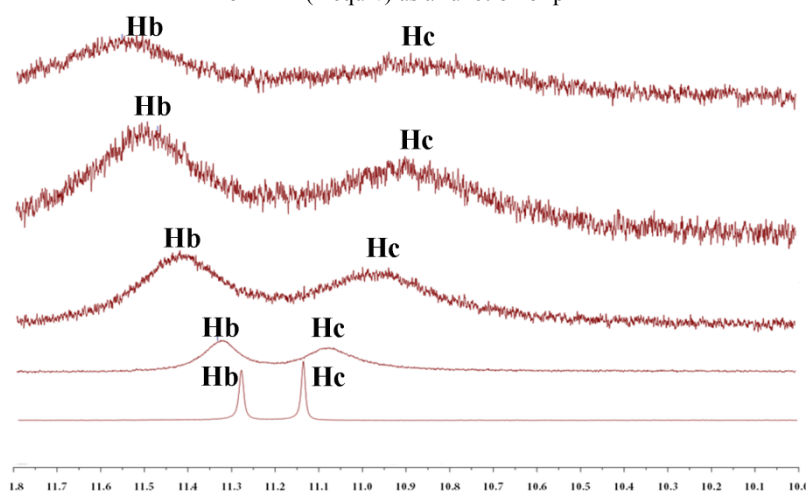

Fig.S6  $^1\text{H}$  NMR spectra changes of Hb and Hc (400 MHz) of **R2** in  $d_6$ -DMSO with titration of various equiv of  $\text{Zn}^{2+}$

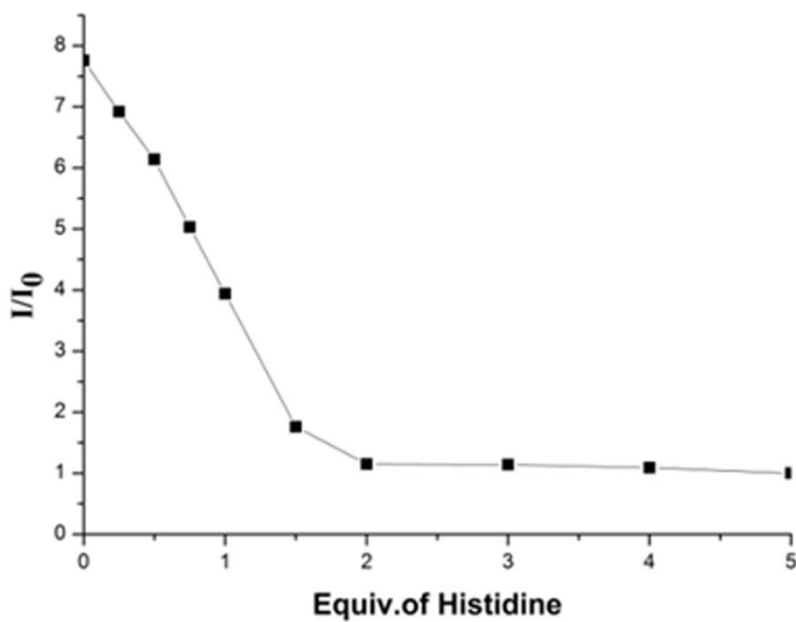

**Fig.S7** Plot of relative fluorescence intensity of **R2**-Zn<sup>2+</sup> complex versus the mole ratio of added Histidine in CH<sub>3</sub>CN/HEPES (v/v=1:1 pH=7.4) I<sub>0</sub> is the fluorescence intensity of **R2**, I is intensity of **R2** with 1 equiv of Zn<sup>2+</sup> and various equiv of histidine

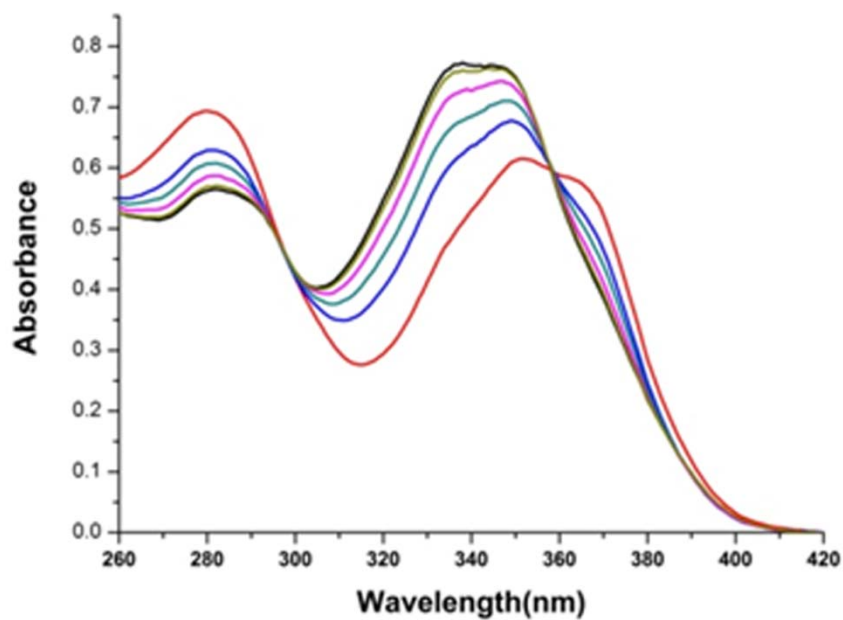

**Fig.S8** Absorption spectra of **R2** during the titration of **R2**-Zn<sup>2+</sup> complex with Histidine (0, 0.5, 1.0, 1.5, 2.0 equiv) in CH<sub>3</sub>CN/HEPES (v/v = 1:1 pH = 7.4)

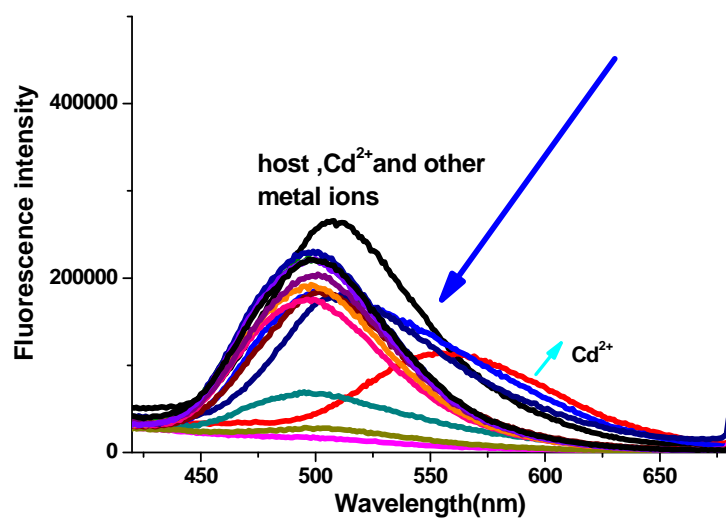

**Fig.S9** Fluorescence spectra of **R2** (10  $\mu$ M) in CH<sub>3</sub>CN/HEPES (10 mM, pH=7.4) = 1:1 (V/V). Upon addition of (30  $\mu$ M) various metal ions.  $\lambda_{ex}$ =350 nm

### <sup>1</sup>H-NMR, <sup>13</sup>C-NMR and HRMS spectra of R1/R2/R3/R4 and intermediates.

#### <sup>1</sup>H-NMR of R1

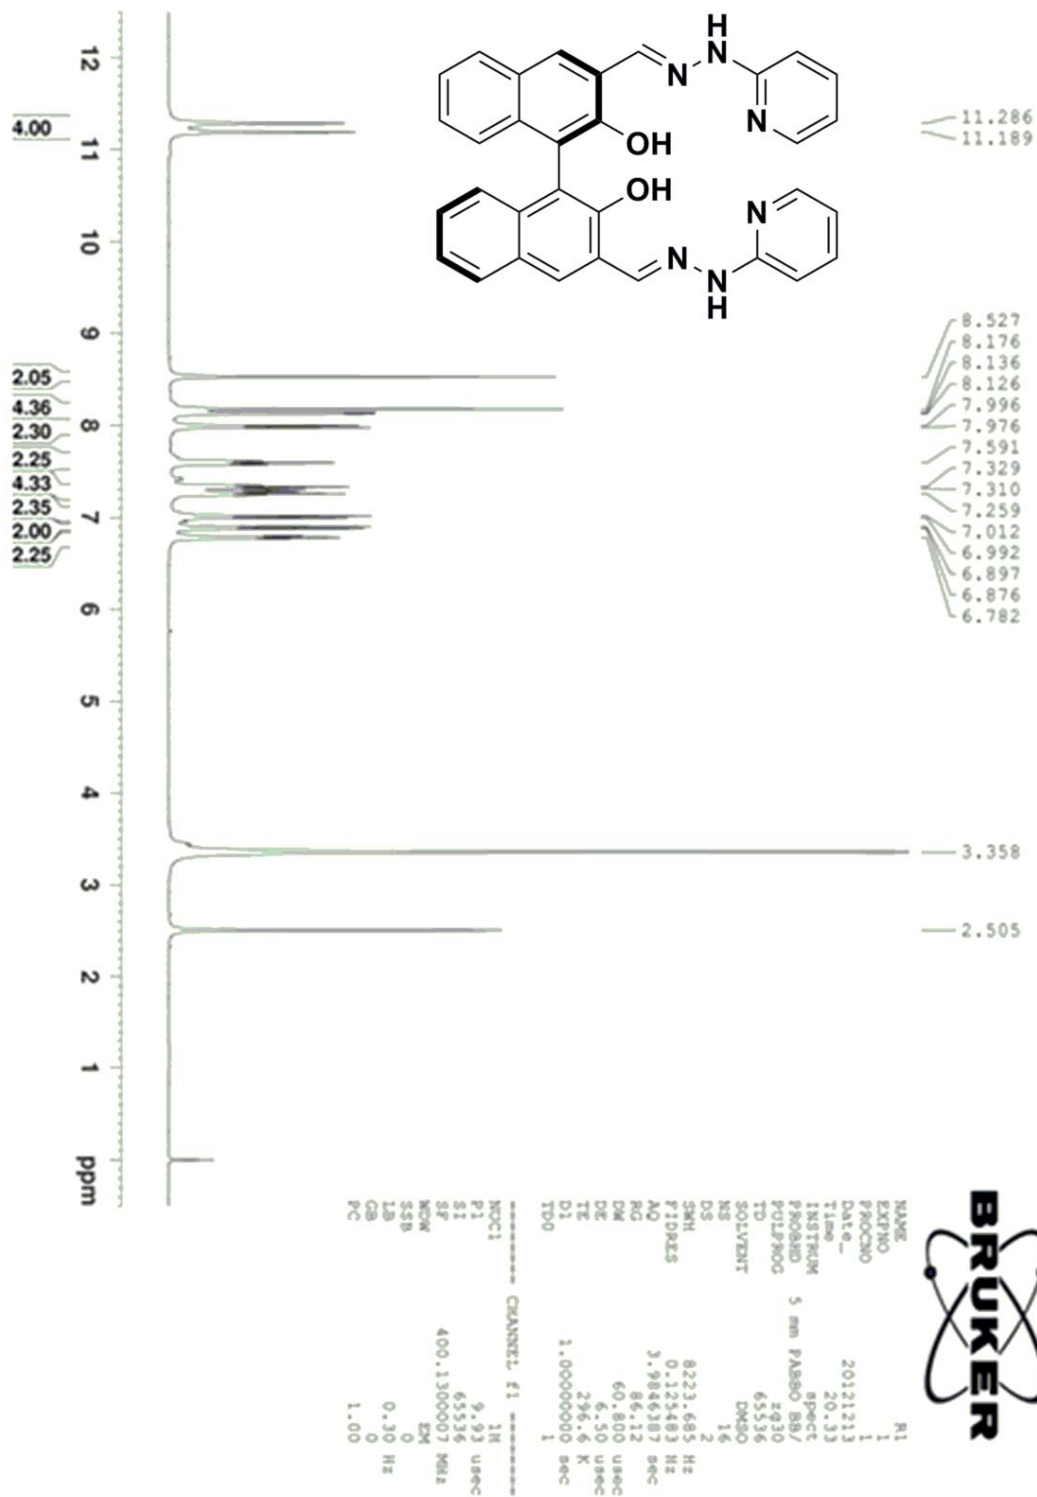

<sup>1</sup>H-NMR of R2

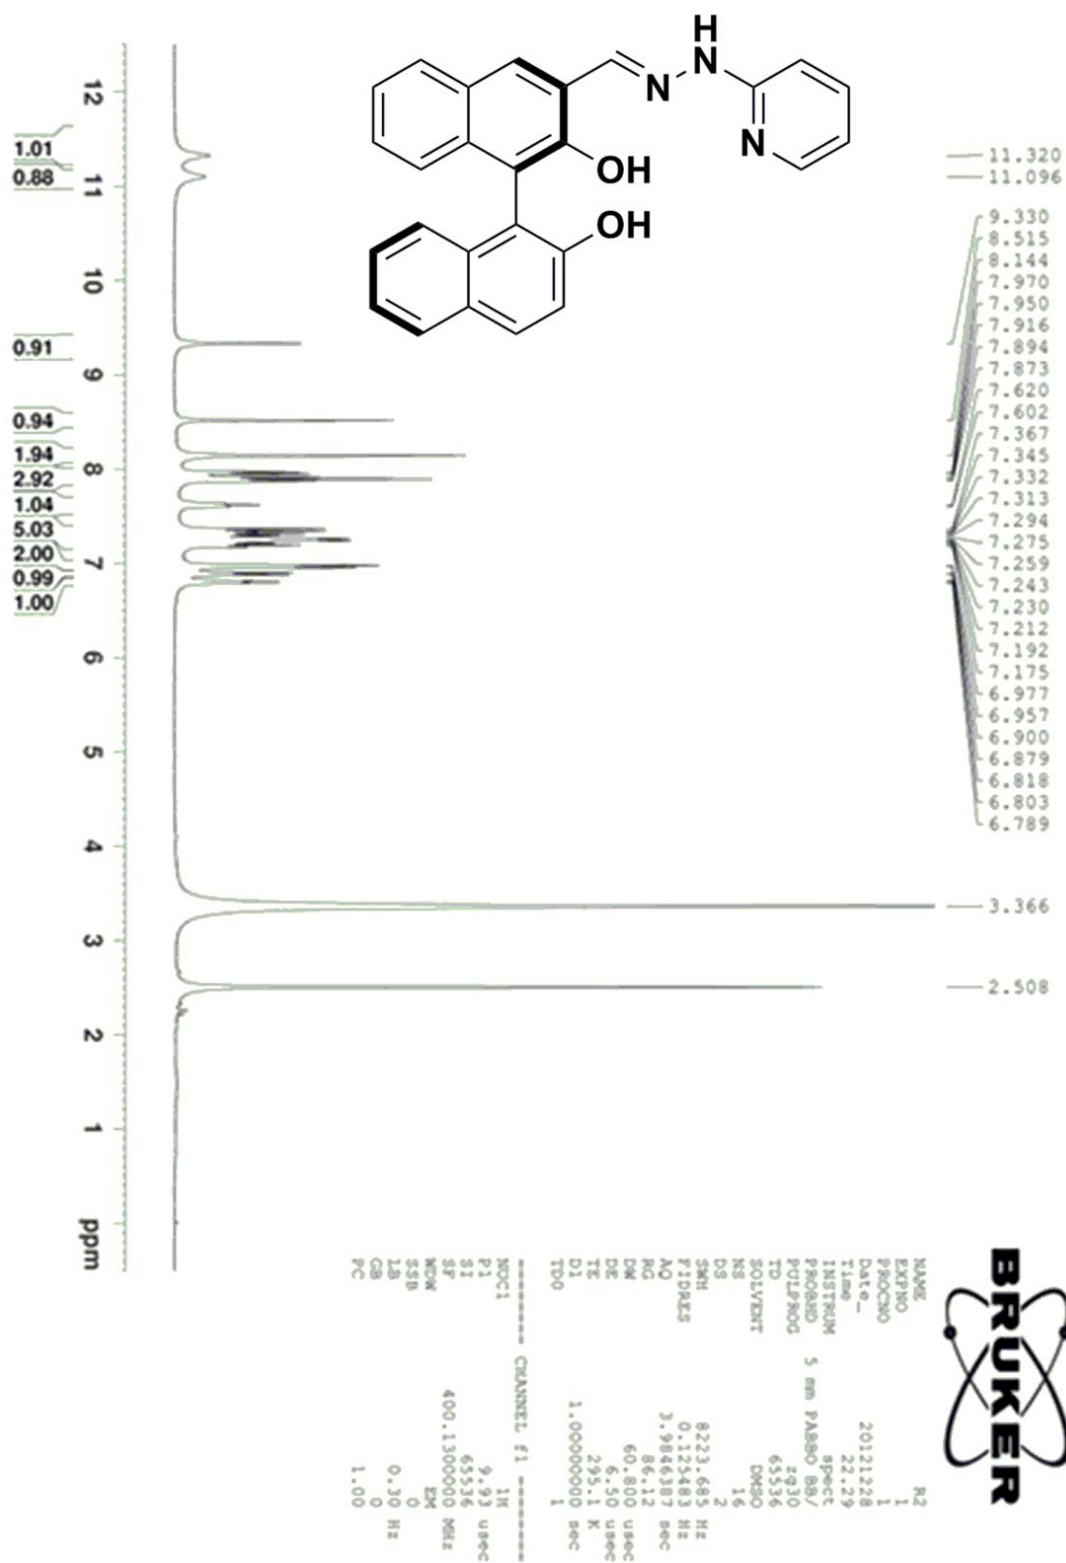



<sup>1</sup>H-NMR of R3

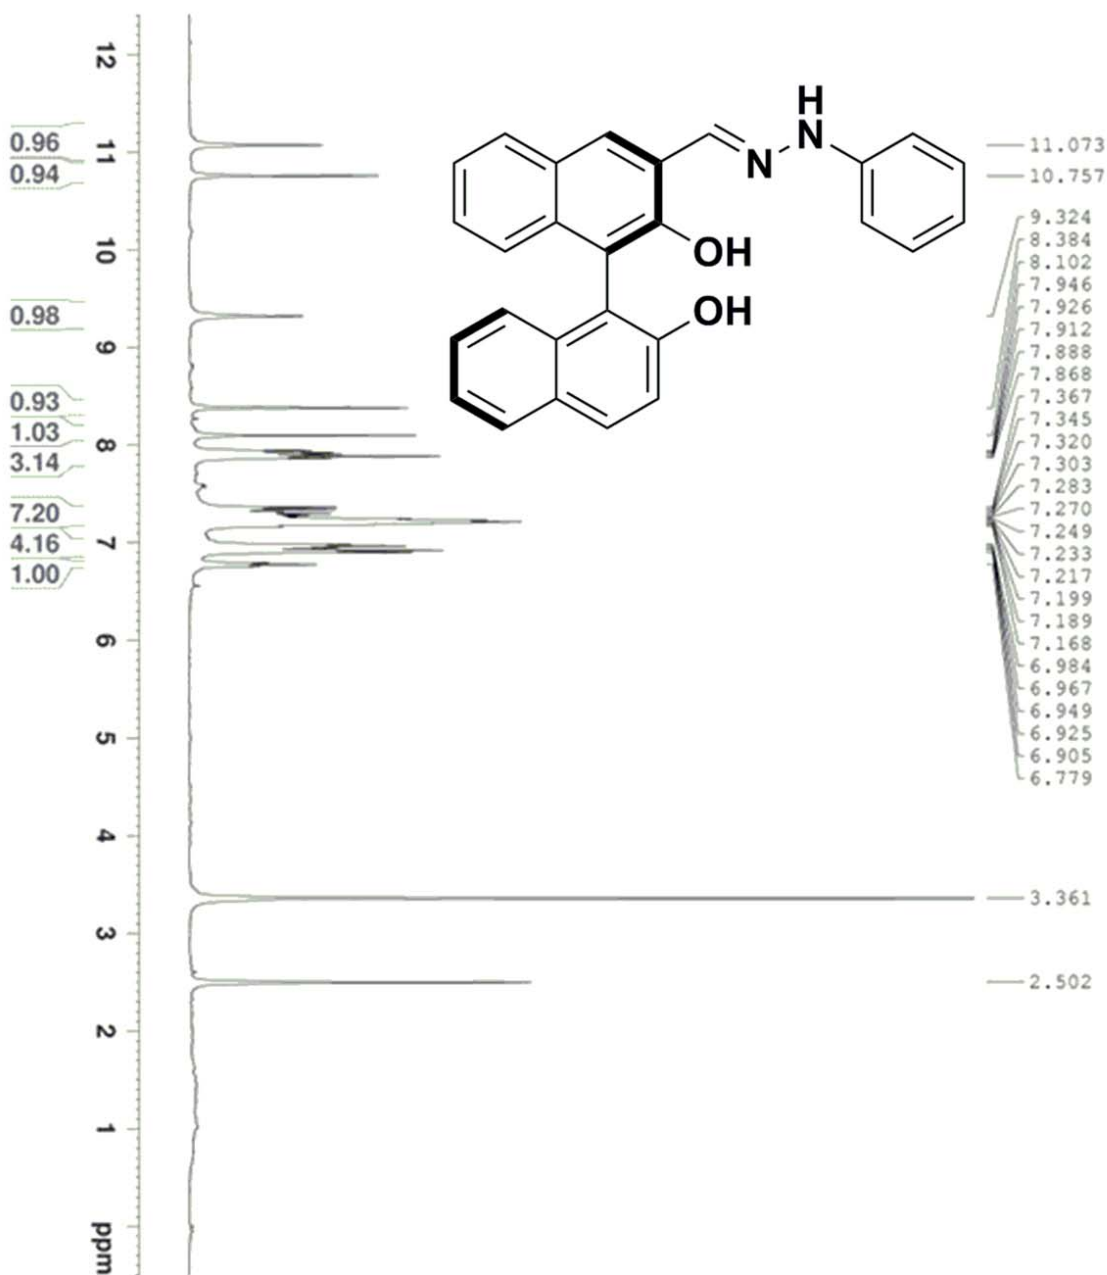

NAME R3  
 EXPNO 2  
 PROCNO 1  
 Date\_ 20130121  
 Time 23.06  
 INSTRUM spect  
 PROBHD 5 mm PABBO BB/  
 PULPROG zgpg30  
 TD 65536  
 SOLVENT DMSO  
 NS 16  
 DS 2  
 SMH 8223.685 Hz  
 FIDRES 0.125483 Hz  
 AQ 3.9846387 sec  
 RG 73.01  
 WC 60.800 usec  
 DE 6.50 usec  
 TE 295.2 K  
 D1 1.00000000 sec  
 TD0 1

===== CHANNEL F1 =====  
 NUC1 1H  
 P1 9.93 usec  
 S1 65536  
 SF 400.1300029 MHz  
 WDM EM  
 SSB 0  
 LB 0.30 Hz  
 GB 0  
 PC 1.00

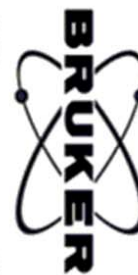

**<sup>1</sup>H NMR of R4**

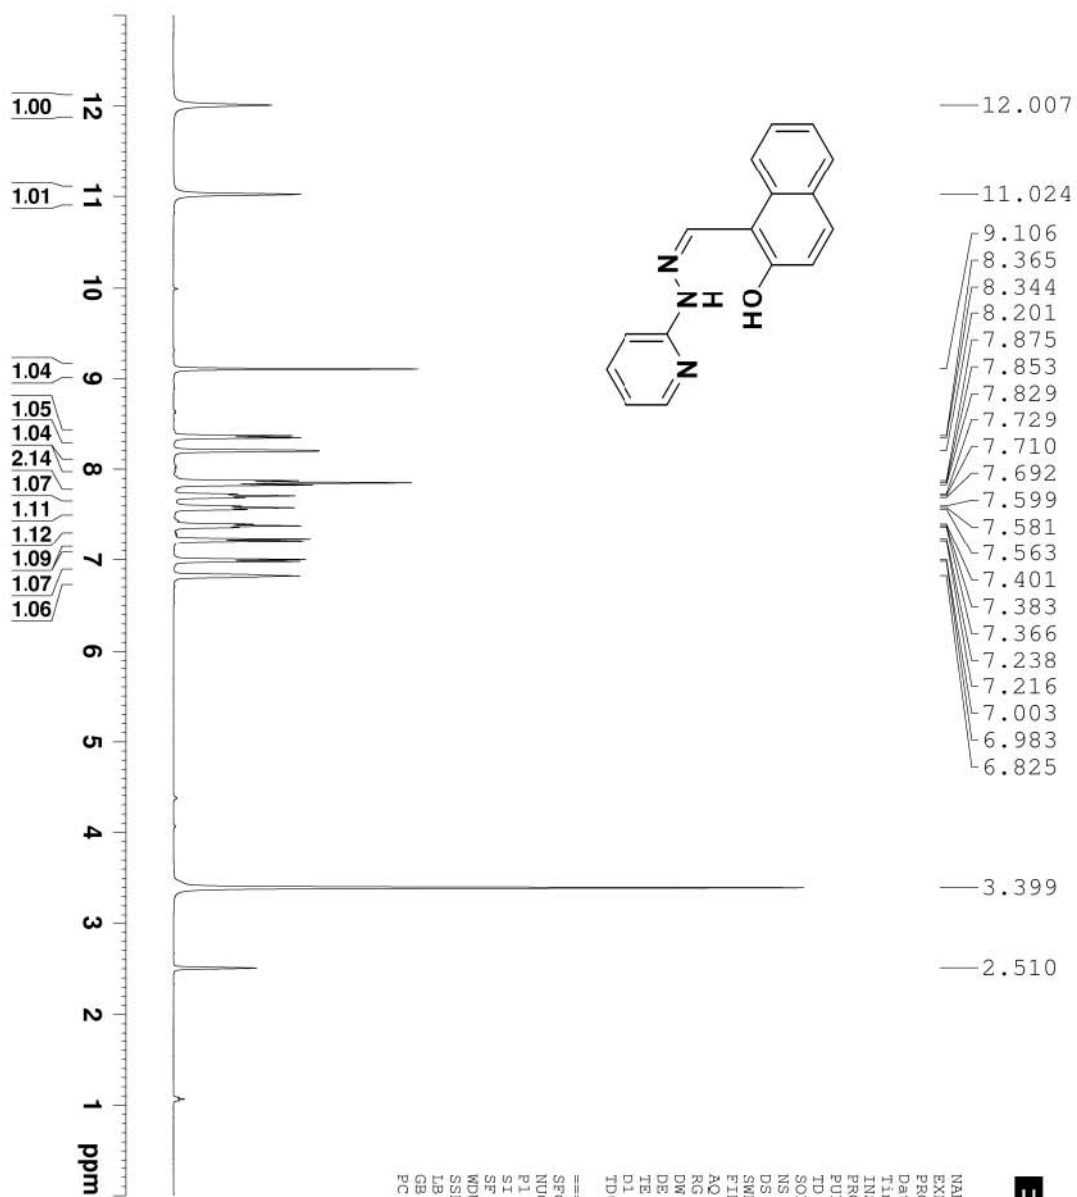

**BRUKER**

NAME yx4-20130625-JSY-0625  
 EXPNO 1  
 PROCNO 1  
 Date\_ 20130625  
 Time 19.41  
 INSTRUM spect  
 PROBHD 5 mm PARBO BB/  
 PULPROG zg30  
 TD 65536  
 SOLVENT DMSO  
 NS 16  
 DS 2  
 SWH 8012.820 Hz  
 FIDRES 0.122266 Hz  
 AQ 4.0894966 sec  
 RG 32.53  
 DW 62.400 usec  
 DE 6.50 usec  
 TE 299.8 K  
 D1 1.00000000 sec  
 TD0 1

===== CHANNEL F1 =====  
 SFO1 400.132809 MHz  
 NUCL1 1H  
 P1 9.80 usec  
 SI 65536  
 SF 400.1300000 MHz  
 WDW EM  
 SSB 0  
 LB 0.30 Hz  
 GB 0  
 PC 1.00



<sup>13</sup>C-NMR of R2

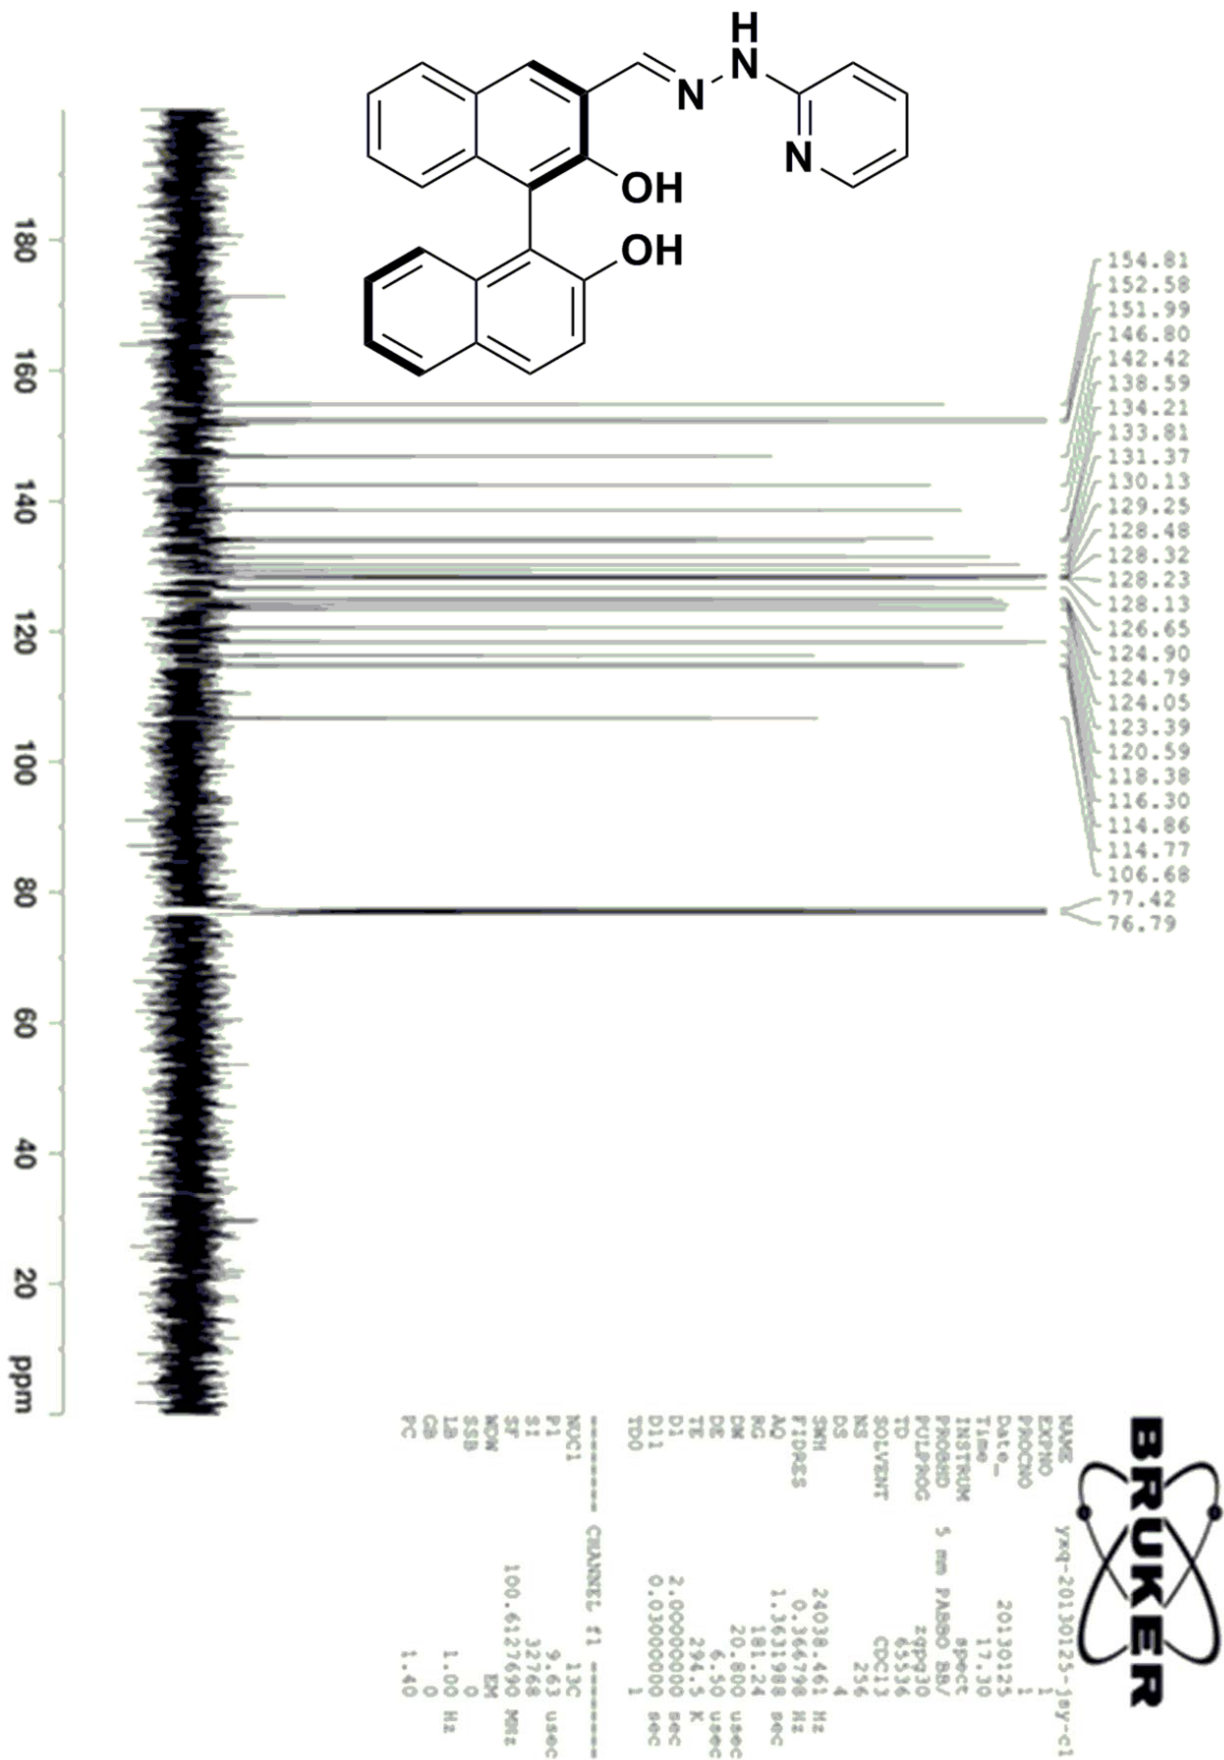

<sup>13</sup>C-NMR of R3

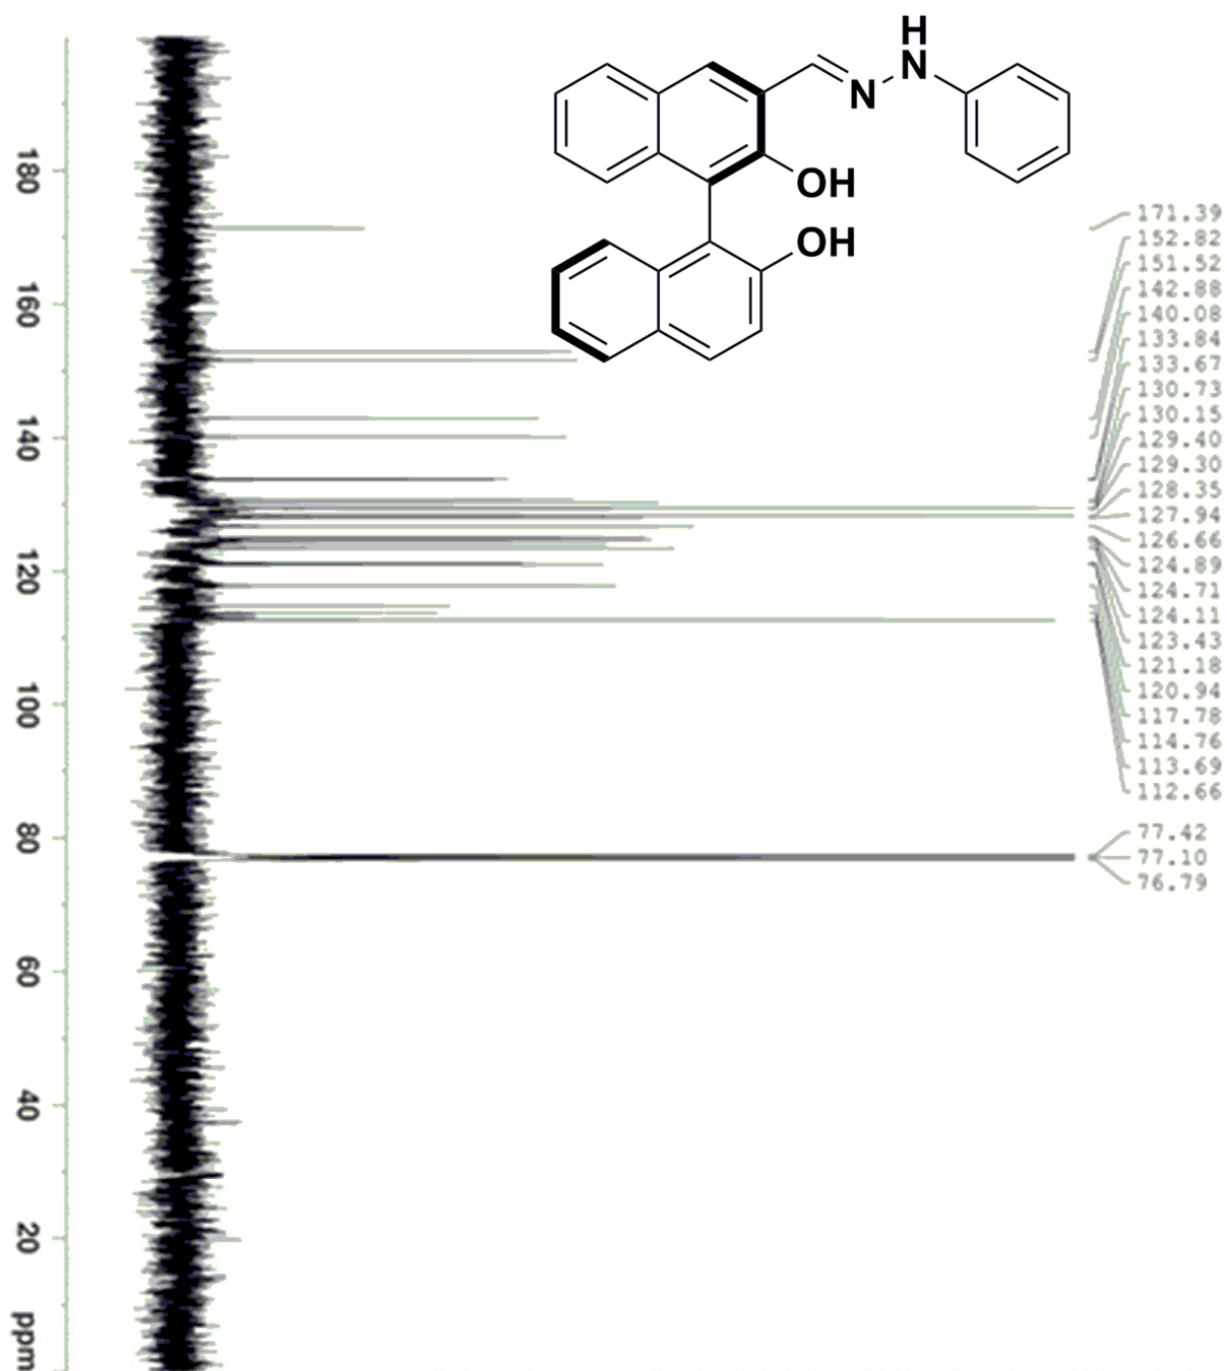

**BRUKER**

NAME: yncq-20130125-1sy-c2  
 EXPNO: 2  
 PROCNO: 1  
 Date\_: 20130125  
 Time: 17.48  
 INSTRUM: spect  
 PROBRD: 5 mm PABBO BB/  
 PULPROG: zgpg30  
 TD: 65536  
 SOLVENT: CDCl3  
 NS: 256  
 DS: 4  
 SMI: 24038.461 Hz  
 FIDRES: 0.366798 Hz  
 AQ: 1.3631988 sec  
 RG: 181.24  
 DM: 20.800 usec  
 DE: 6.50 usec  
 TE: 294.3 K  
 D1: 2.00000000 sec  
 D11: 0.03000000 sec  
 TDO: 1

----- CHANNEL #1 -----  
 NUC1: <sup>13</sup>C  
 P1: 9.63 usec  
 S1: 32768  
 SF: 100.6127690 MHz  
 KW: EM  
 SSB: 0  
 LB: 1.00 Hz  
 GB: 0  
 PC: 1.40

<sup>13</sup>C-NMR of R4

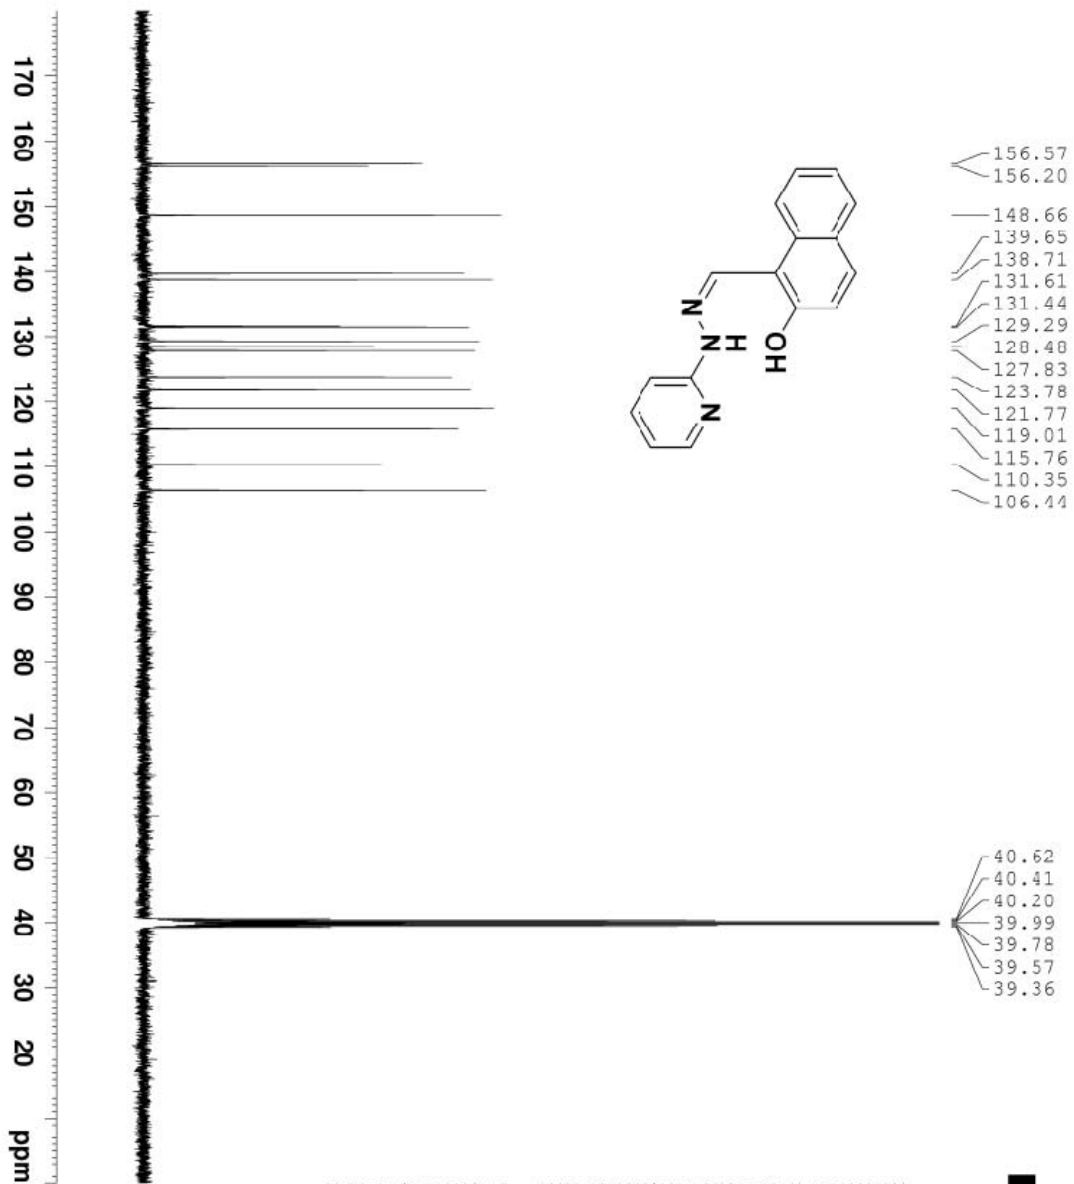

NAME ykq-20130625-JSY-0625  
 R4  
 RXNNO 1  
 FROCN0 2  
 Date\_ 20130625  
 Time 19.56  
 INSTRUM spect  
 PROBHD 5 mm PABBO BB/  
 PULPROG zgpg30  
 TD 65536  
 SOLVENT DMSO  
 NS 256  
 DS 4  
 SFR 24038.461 Hz  
 FIDRES 0.366798 Hz  
 AQ 1.3631988 sec  
 RG 203.91  
 RC 20.800 usec  
 DW 6.50 usec  
 DE 300.5 K  
 TE 2.00000000 sec  
 D1 0.03000000 sec  
 TD0 1

===== CHANNEL f1 =====  
 SFO1 100.6228243 MHz  
 NUCL1 13C  
 P1 9.80 usec  
 SI 32768  
 SE 100.6127690 MHz  
 WDW DM  
 SSB 0  
 LB 1.00 Hz  
 GB 0  
 PC 1.40

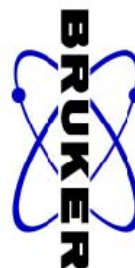

### HRMS of 1

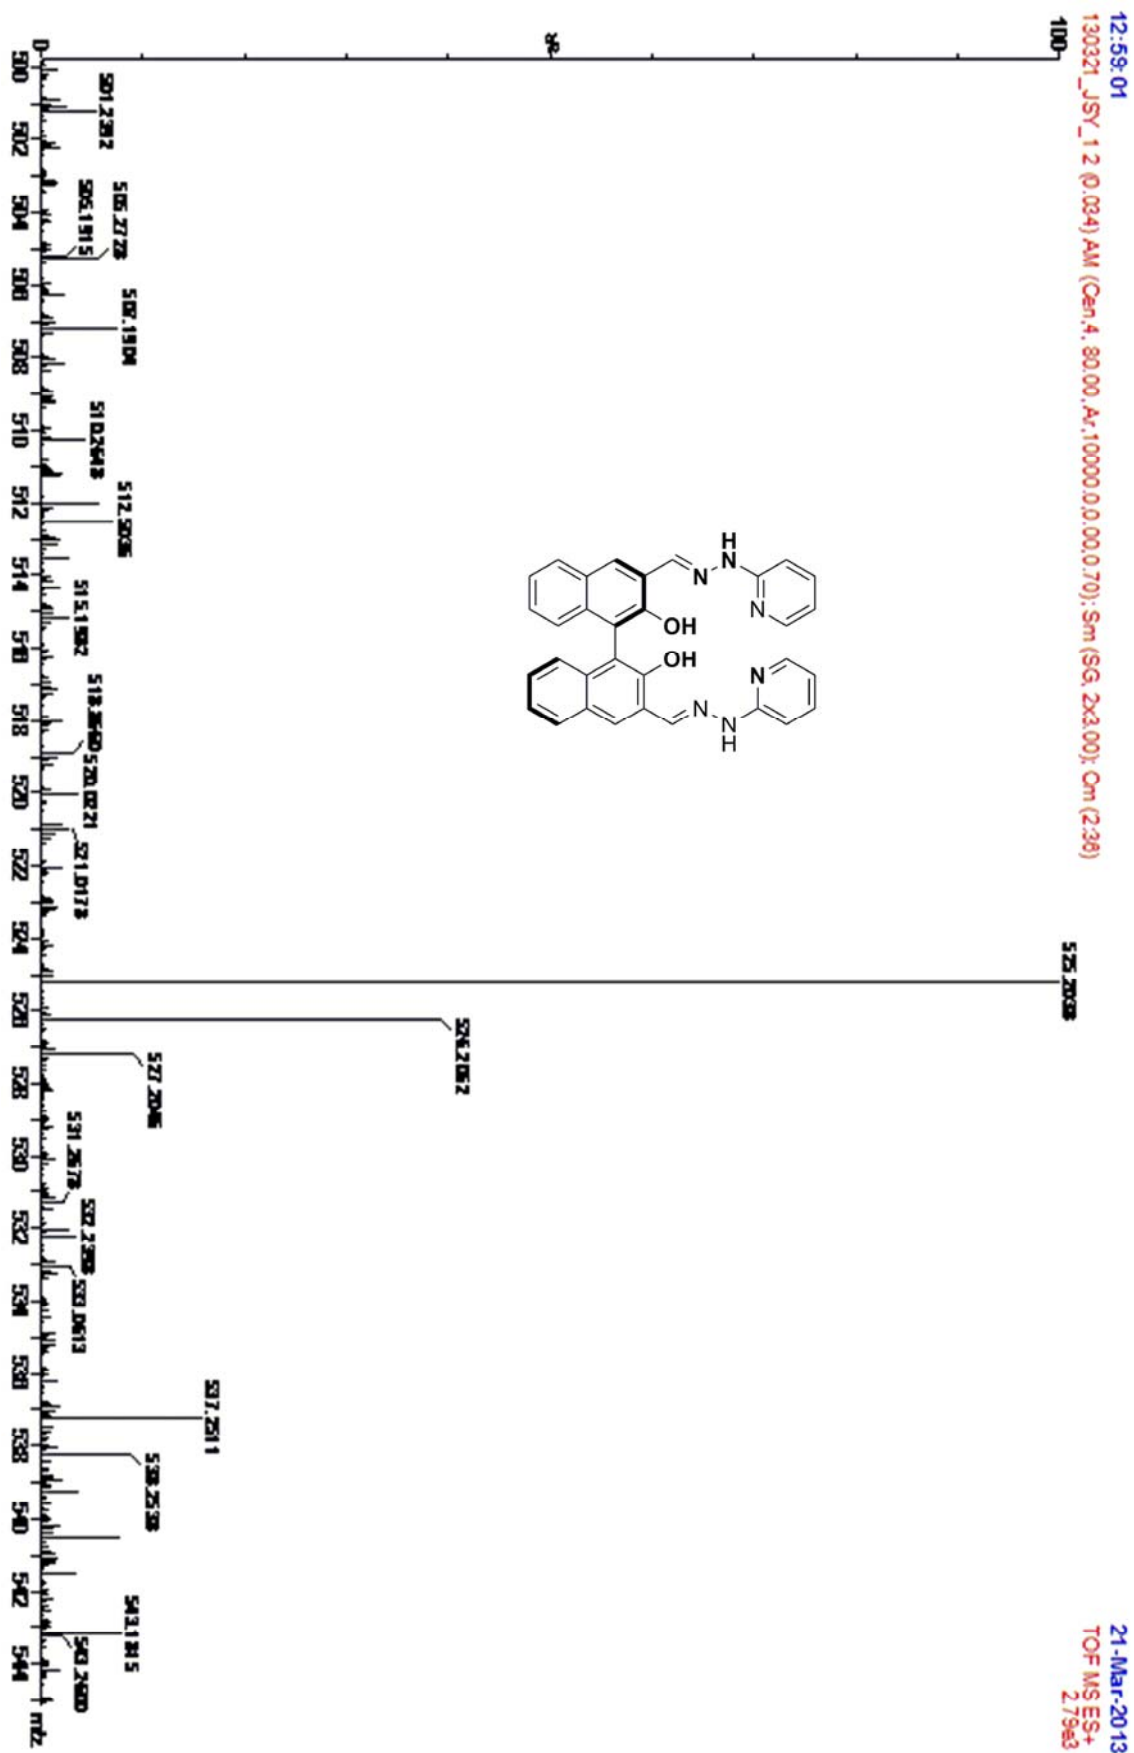

### HRMS of 2

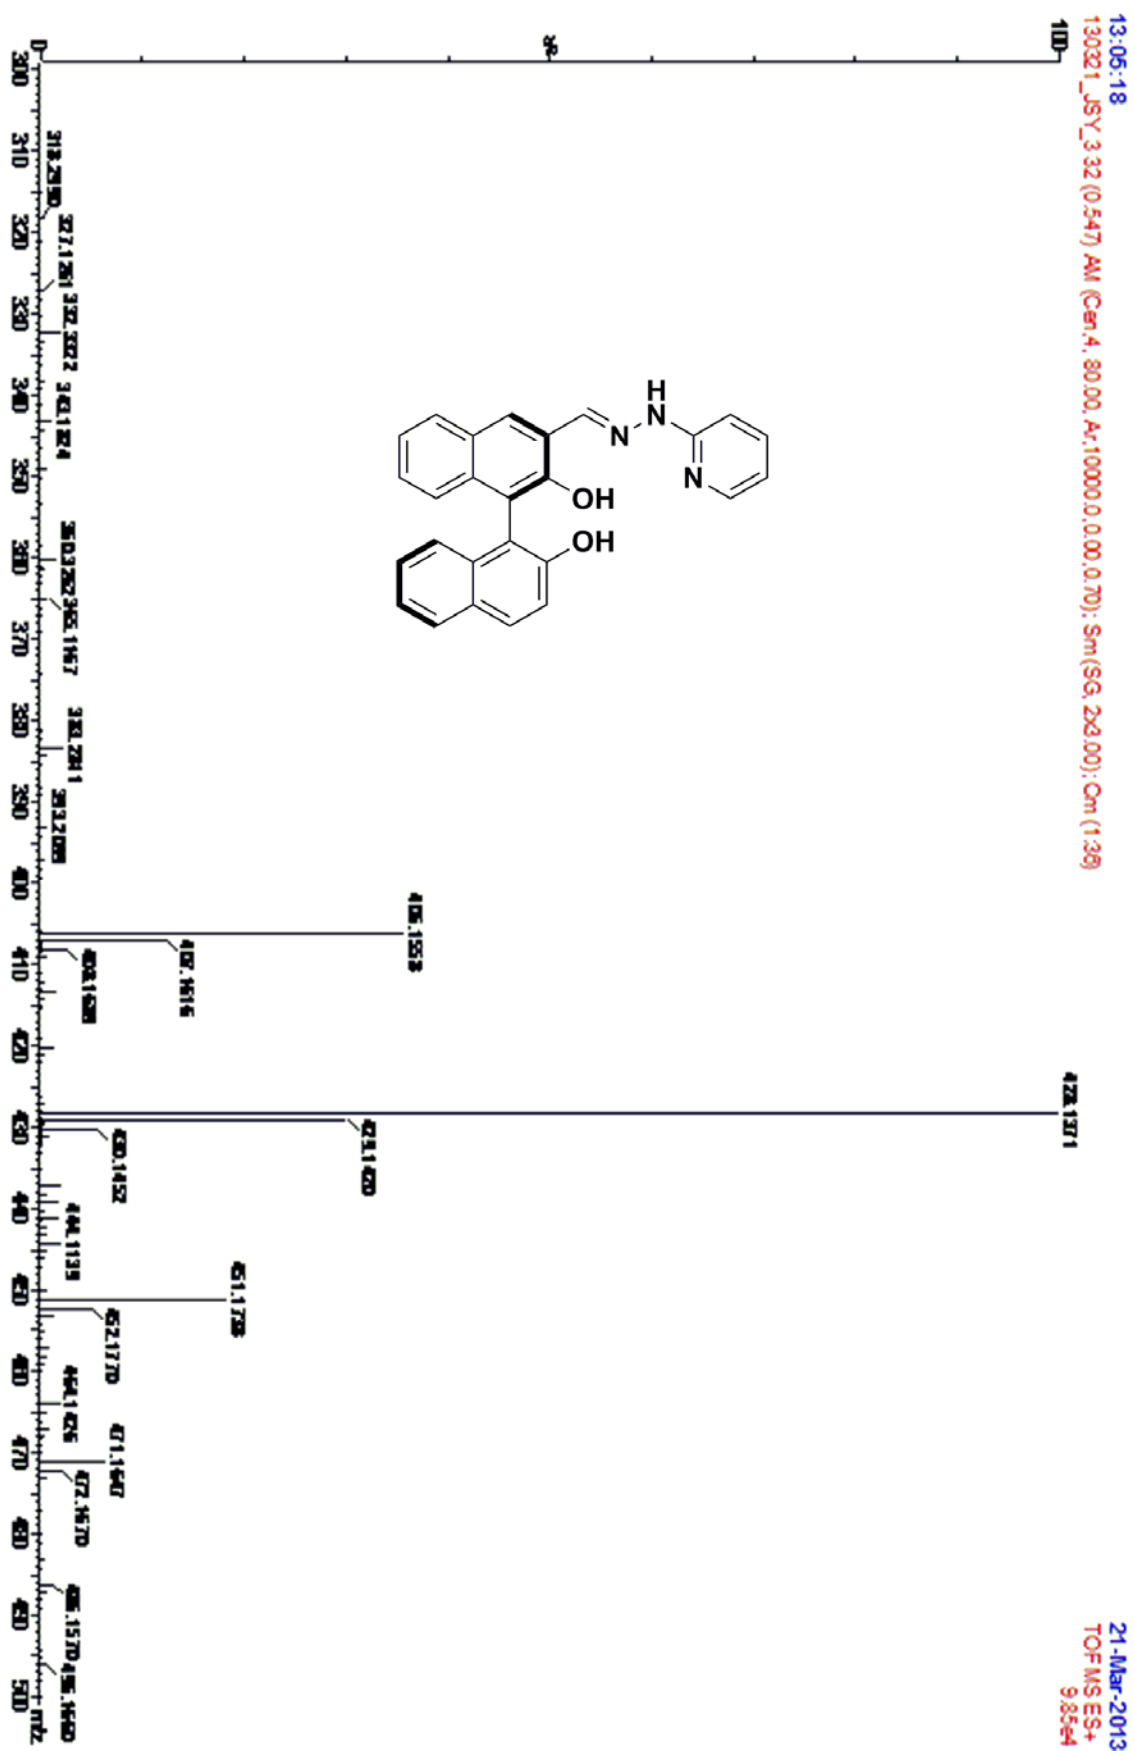



### HRMS of 3

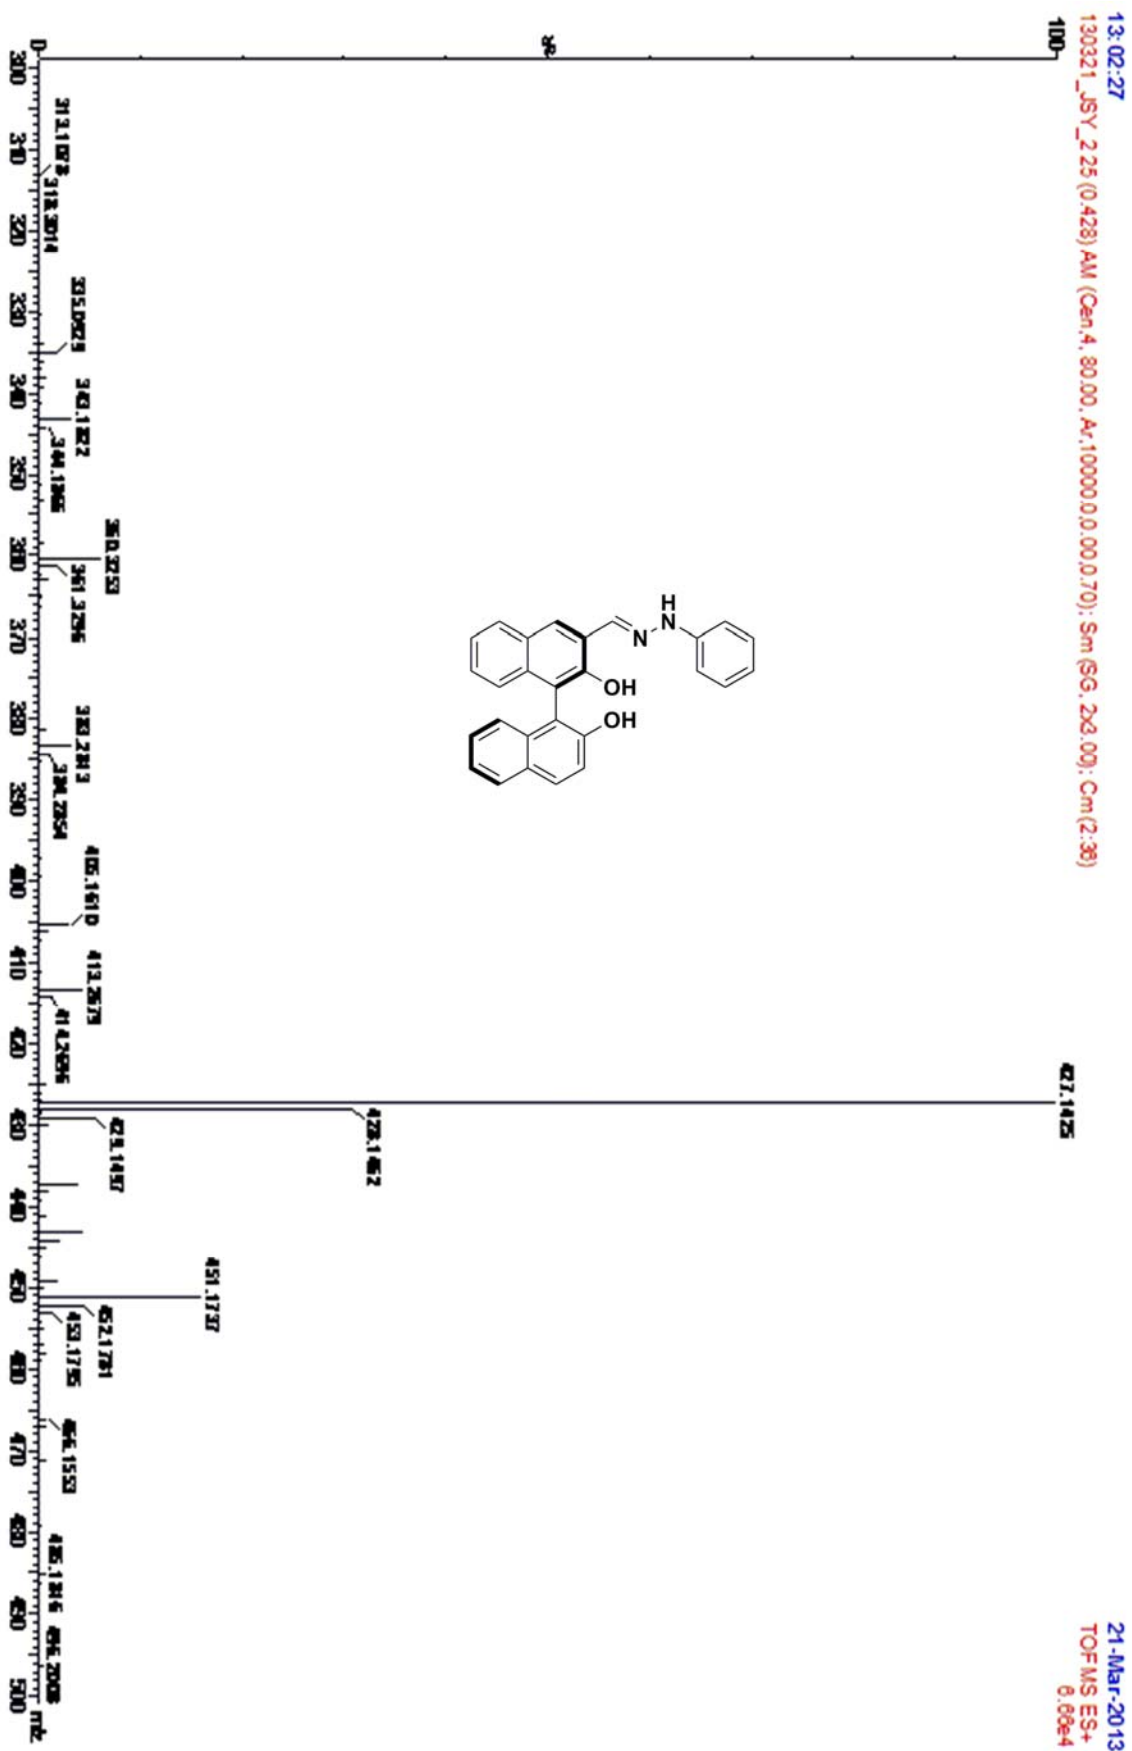

### HRMS of 2-Zn<sup>2+</sup> complex

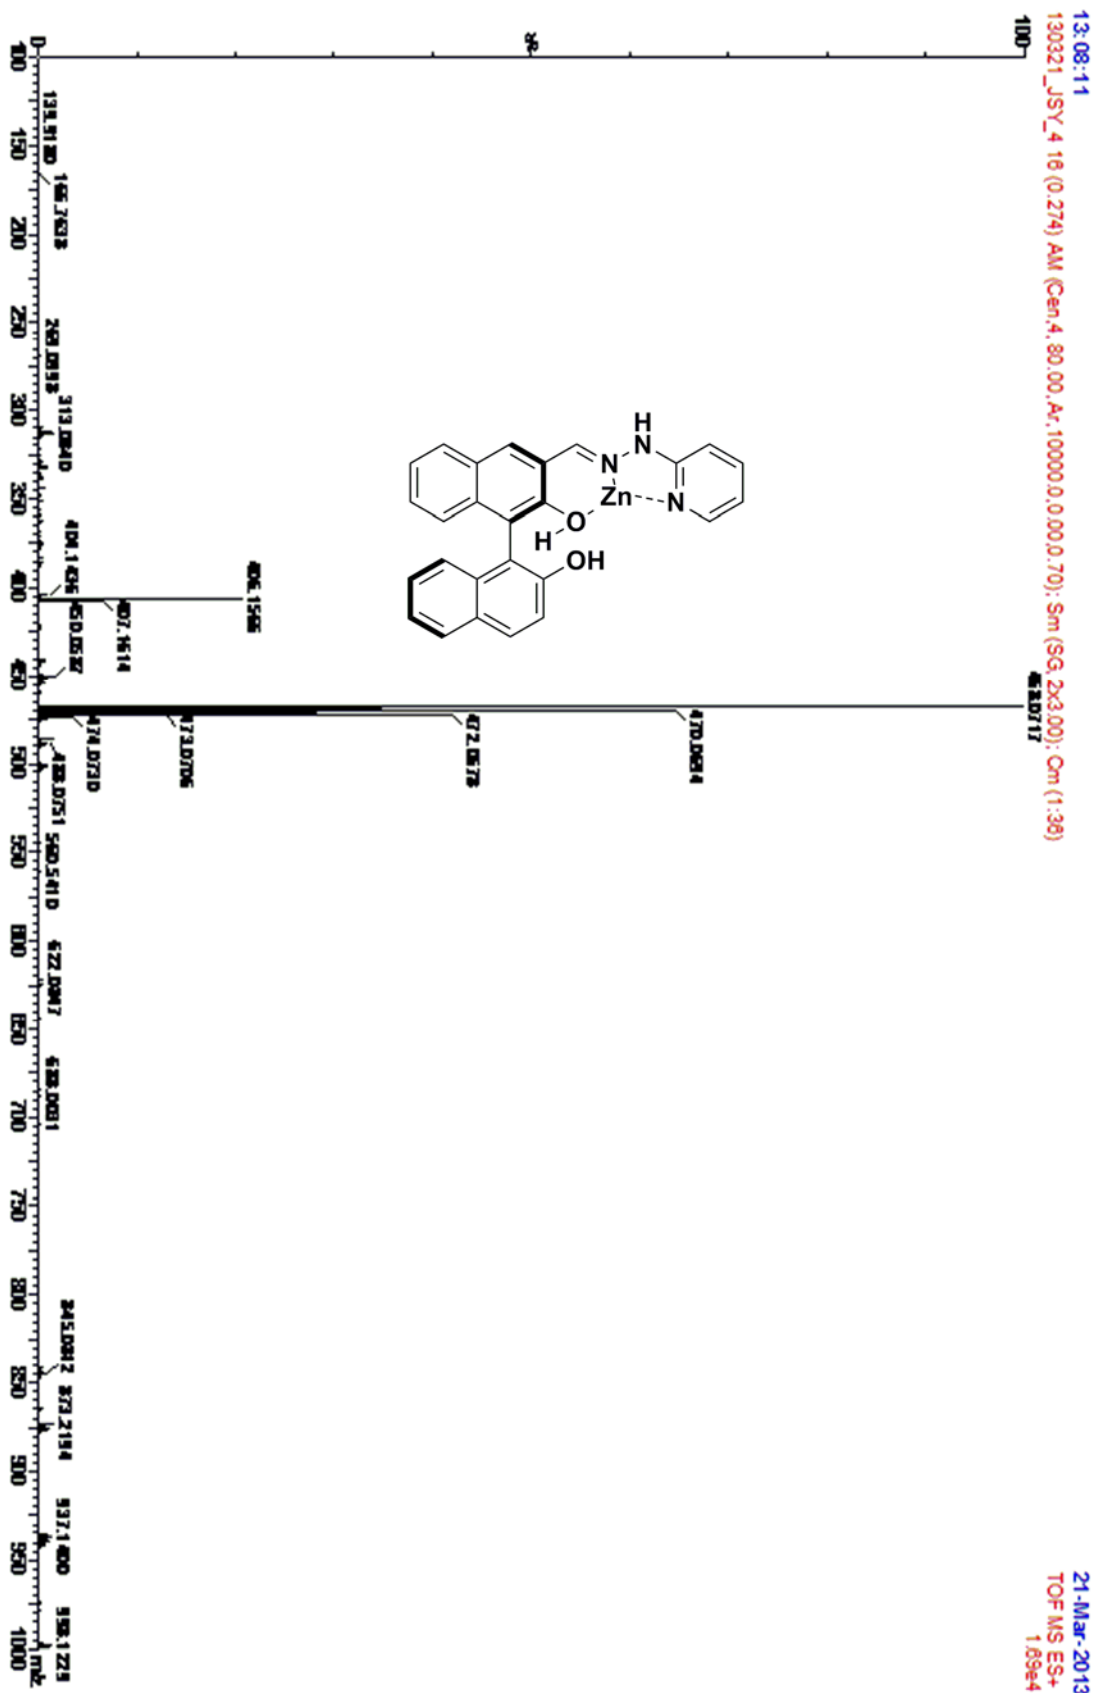

Supplement: c3an00979c.pdf [file c3an00979c.pdf]
